# Supplementary material
Source: PubMed Central journal article supplement (PMC2810120)
Supplement: NIHMS166184-supplement-Supplementary_Figure.pdf [file NIHMS166184-supplement-Supplementary_Figure.pdf]

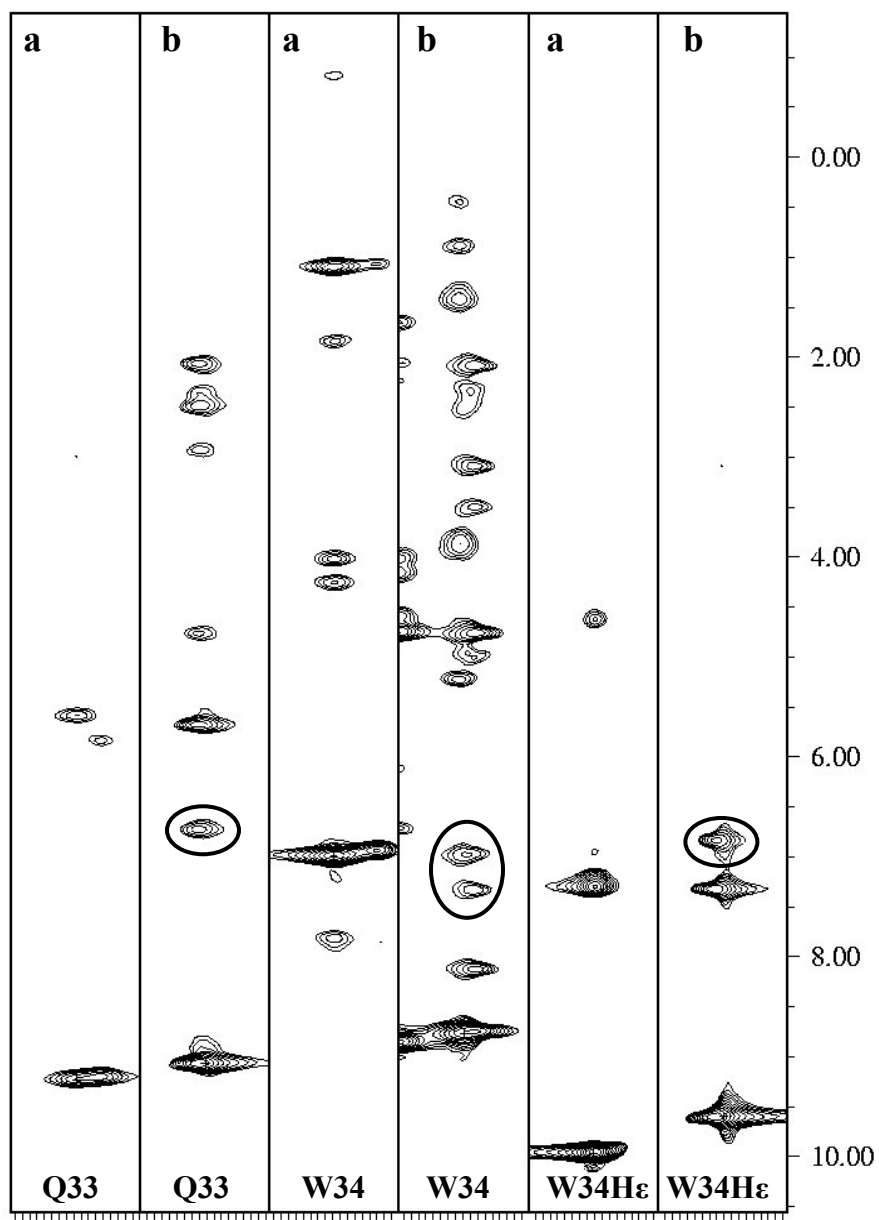

**Supplementary Figure 1.** Comparison of strips from 3D- $N^{15}$ -NOESY spectra of Pin1 in absence (a) and in presence (b) of compound **29** (1:10 molar ratio Pin1/compound). Intermolecular NOE cross-peaks observed in the aromatic region (6.00 – 8.00 ppm) are circled.
